# Supplementary material for: Independent Component Analysis of the Effect of L-dopa on fMRI of Language Processing
Source: PLOS journal article supplement (doi:10.1371/journal.pone.0011933), 2010-08-17
Supplement: S2 (10.1371/journal.pone.0011933.s002) [file journal.pone.0011933.s002]

## Text S2. Correlation threshold calculation

By using Fisher's r-to-z transformation,  $Z = \frac{1}{2} \ln \frac{1+r}{1-r} \sim N\left(0, \frac{1}{T-3}\right)$ , where T is the number of the volume scans in a run. Let  $v_i = \frac{2}{\sqrt{T-3}} z_{\alpha_i}$ , for a given  $\alpha_i$ ,  $i=1, \dots, Q$  (number of IC for a subject within one condition). The correlation threshold with significance level  $\alpha_i$  satisfies  $r_i > \frac{e^{v_i}-1}{e^{v_i}+1}$ . In order to adjust multiplicity, we find an error rate  $\alpha_i$  for each IC to achieve an overall family error rate  $\alpha$ . Assuming independence of these tests, it is known [1] that

$$\Pr(\text{At least one Type I error among } Q \text{ tests}) = 1 - \prod_{i=1}^Q (1 - \alpha_i).$$

Now, using  $\alpha_1 = \dots = \alpha_Q$ , the significance level  $\alpha_i$  is then given by

$$1 - (1 - \alpha_i)^Q < \alpha \Rightarrow \alpha_i < 1 - (1 - \alpha)^{1/Q}.$$

Thus, e.g., if  $\alpha=0.05$ , then for  $Q=25$ , the threshold for r is given by  $r > 0.33$ .

## References

1. Hsu J (1996) Multiple comparisons: theory and methods. Chapman & Hall. 11 p.
